# Supplementary material for: The F-box protein FKF1 inhibits dimerization of COP1 in the control of photoperiodic flowering
Source: PubMed Central journal article supplement (PMC5741637; doi:10.1038/s41467-017-02476-2), 2017-12-22
Supplement: 41467_2017_2476_MOESM1_ESM.pdf [file 41467_2017_2476_MOESM1_ESM.pdf]

**Supplementary Information** – Lee *et al.*

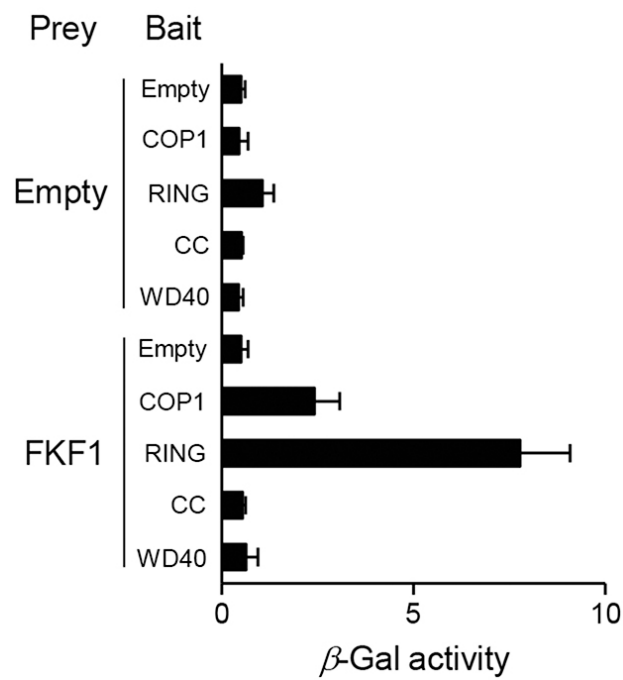

**Supplementary Figure 1. FKF1 interacts with COP1 in yeast two-hybrid assays.** FKF1 directly interacts with COP1. The binding activity was measured by  $\beta$ -galactosidase ( $\beta$ -Gal) activity. Data are means  $\pm$  s.d. of three replicates.

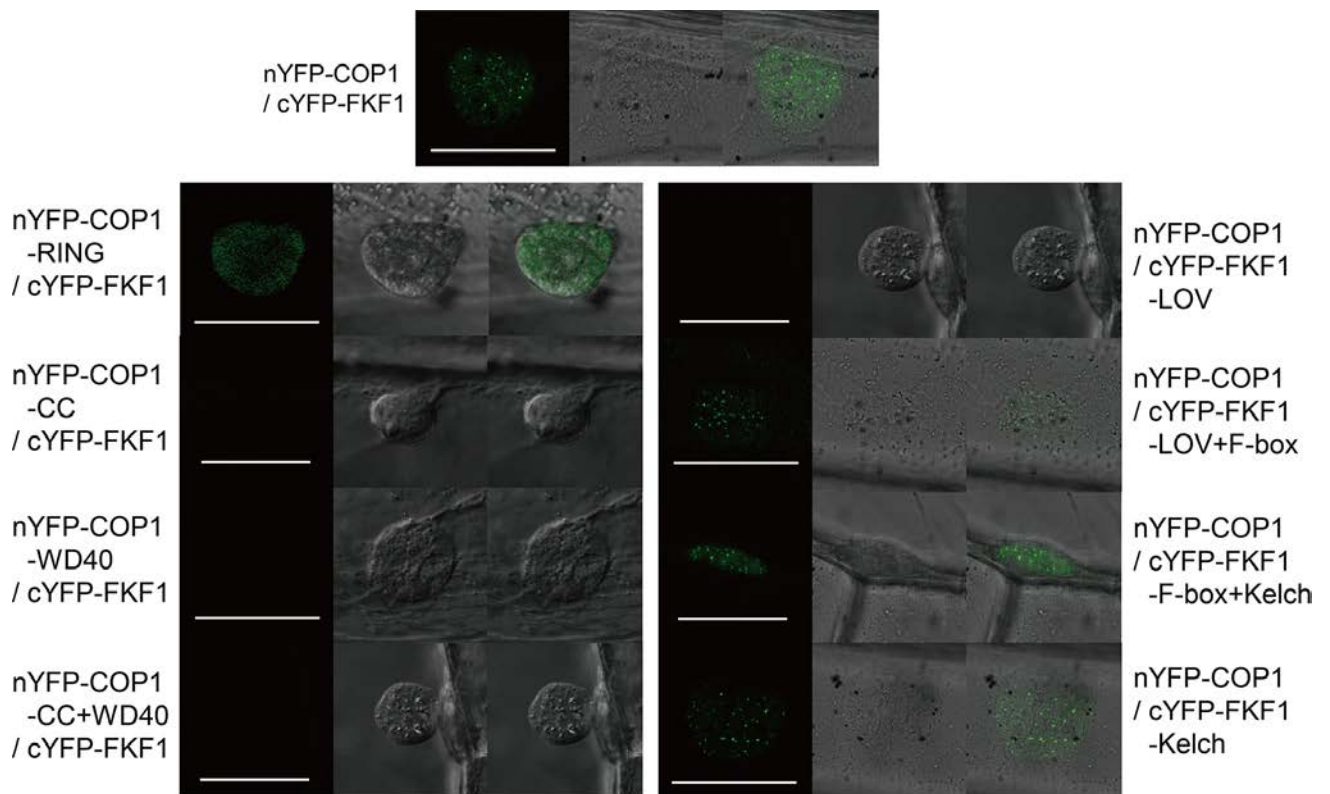

**Supplementary Figure 2. BiFC assays to identify the interacting domains of FKF1 and COP1.**

To investigate of domain interaction between FKF1 and COP1, full-length and partial (RING, aa 1–104; CC, aa 121–213; WD40, aa 371–675; CC + WD40, aa 121–675) cDNAs of *COP1* were cloned into the pSAT5-DEST-cEYFP(175-end)-C1 (pE3130) vector, and *FKF1* was cloned into the pSAT4-DEST-nEYFP(1-174)-C1 (pE3136) vector as full and partial cDNAs (LOV, aa 1–174; LOV + F-box, aa 1–283; F-box + KELCH, aa 174–618; KELCH, aa 283–618). Each pair of recombinant plasmids encoding nEYFP or cEYFP fusion proteins was co-bombarded into onion epidermal cell layers. DIC, differential interference contrast; nY, nEYFP; cY, cEYFP; scale bars, 40  $\mu$ m.

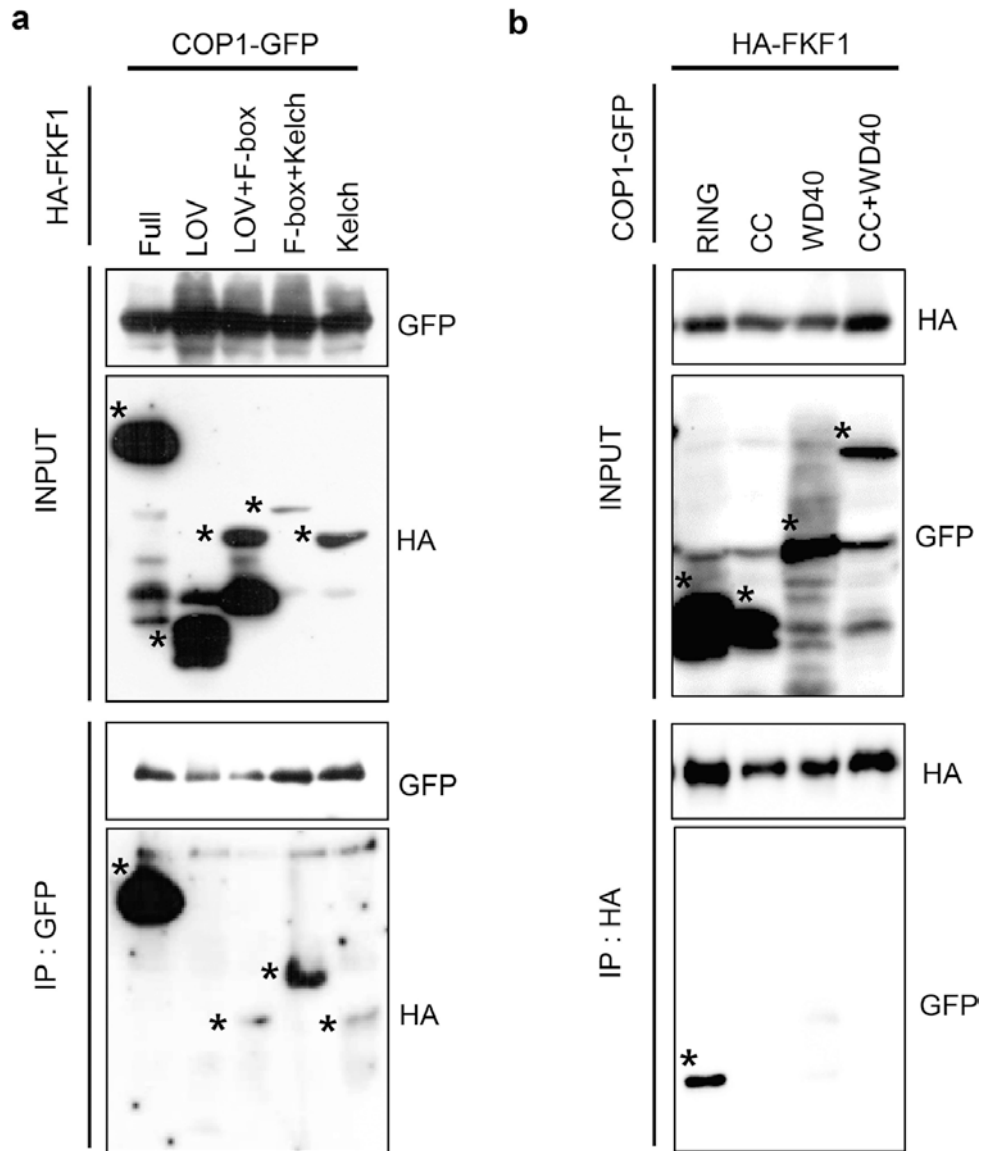

**Supplementary Figure 3. Co-immunoprecipitation assays to test the interacting domains of FKF1 and COP1.** (a) To confirm the domain interaction between FKF1 and COP1, the full and partial cDNAs (LOV, aa 1–174; LOV + F-box, aa 1–283; F-box + KELCH, aa 174–618; KELCH, aa 283–618) of *FKF1* were cloned into the pEarleyGate201 vector to produce HA-tagged fusion proteins, and the full-length cDNA of *COP1* was cloned into the pMDC85 vector to produce a GFP-tagged fusion protein. (b) The partial (RING, aa 1–104; CC, aa 121–213; WD40, aa 371–675; CC + WD40, aa 121–675) cDNAs of *COP1* were cloned into the pMDC85 vector to produce GFP-tagged fusion proteins, and the full-length cDNA of *FKF1* was cloned into the pEarleyGate201 vector to produce an HA-tagged fusion protein. These plasmids were transformed into *Agrobacterium tumefaciens* strain GV3101 by electroporation, and co-infiltrated into leaves of *N. benthamiana*. \* indicates each protein band.

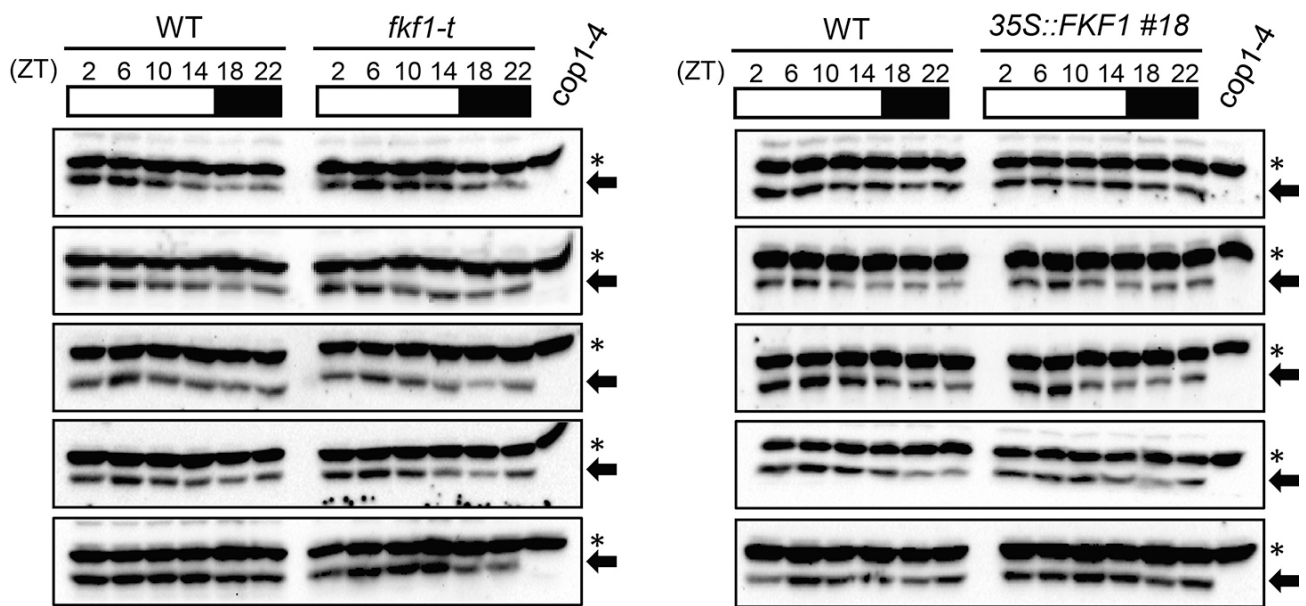

**Supplementary Figure 4. The diurnal patterns of COP1 levels in *fkf1-t* and *35S::FKF1* plants.**

The 10-day-old seedlings grown in LD were harvested every 4 h over the course of a day. Total protein (70  $\mu$ g) extracted from each sample was immunoblotted with an anti-COP1 polyclonal antibody. The intensity of each COP1 band (black arrows) was normalized to the nonspecific band (\* as loading control).

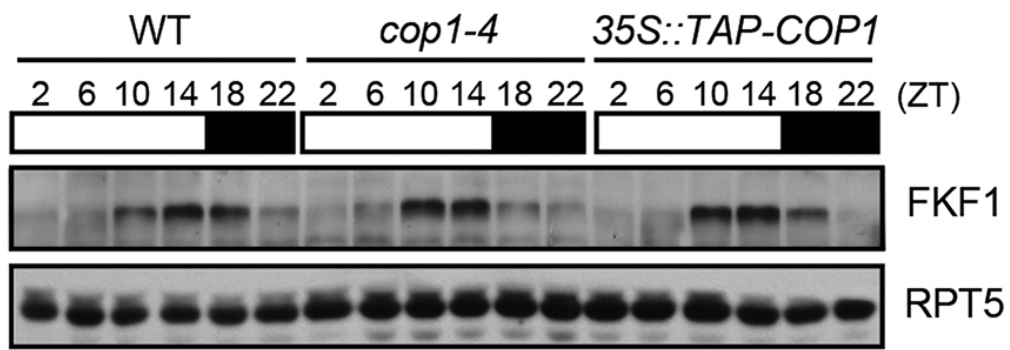

**Supplementary Figure 5. The FKF1–COP1 interaction does not affect FKF1 stability.** The diurnal patterns of FKF1 levels are shown in WT, *cop1-4*, and *35S::TAP-COP1* plants under LD. The 10-day-old seedlings were harvested every 4 h over the course of a day. Total protein (70 µg) extracted from each sample was immunoblotted to measure the FKF1 levels using an anti-FKF1 antibody. For a loading control, RPT5 levels were detected with an anti-RPT5 antibody.

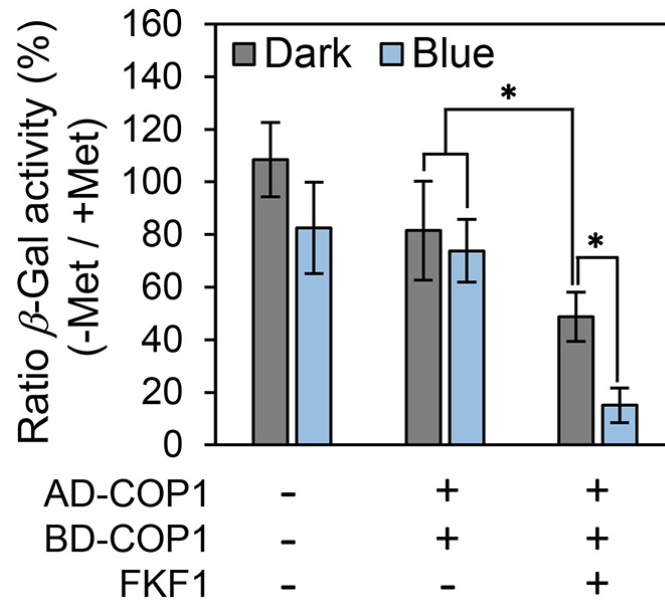

**Supplementary Figure 6. FKF1 inhibits COP1 homo-dimerization more under blue light than in dark conditions.** The transformed yeast cells as pGAD (empty) / pBridge (empty) vector only, pGAD-COP1 [for activation domain (AD) fused COP1] / pBridge-COP1 [for binding domain (BD) fused COP1] without FKF1, and pGAD-COP1 / pBridge-COP1 with FKF1 (in Met-repressible *pMET25* promoter), were prepared under four different conditions; 1 mM Met in dark (+Met/dark), without Met in dark (-Met/dark), 1 mM Met under blue light (+Met/blue) and without Met under blue light (-Met/blue). COP1 homodimerization was measured by activation of the reporter gene encoding  $\beta$ -galactosidase and the ratios of  $\beta$ -galactosidase activity were calculated as  $[(-\text{Met}/+\text{Met}) \times 100]$ . Data are means  $\pm$  s.d from three independent yeast cells. Asterisks indicate significant difference between dark and blue light conditions (Student's *t*-test, \*  $P < 0.05$ ).

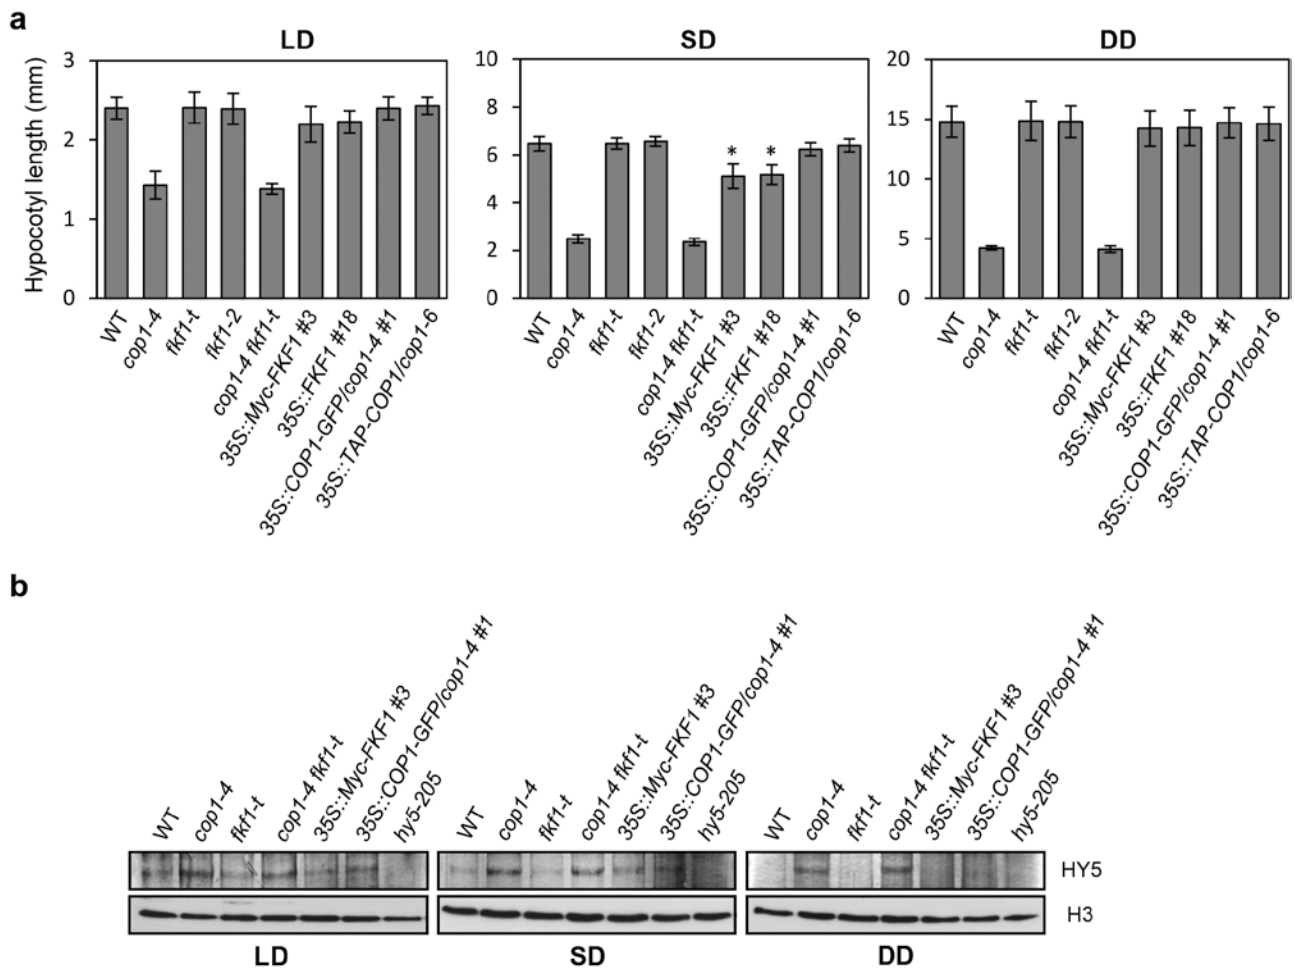

**Supplementary Figure 7. FKF1 is involved in hypocotyl elongation.** (a) Hypocotyl length in various plants. Plants were grown for 5 days in LD and SD under cool-white fluorescent light ( $90 \mu\text{mol m}^{-2} \text{s}^{-1}$ ), or constant darkness (DD). Data are means  $\pm$  standard deviations of at least 20 seedlings. (b) HY5 accumulation in various plants. Plants were grown for 5 days under each condition (LD/SD/DD), and harvested. Nuclear protein-enriched fractions were immunoblotted using an anti-HY5 antibody and an anti-H3 antibody for a loading control.

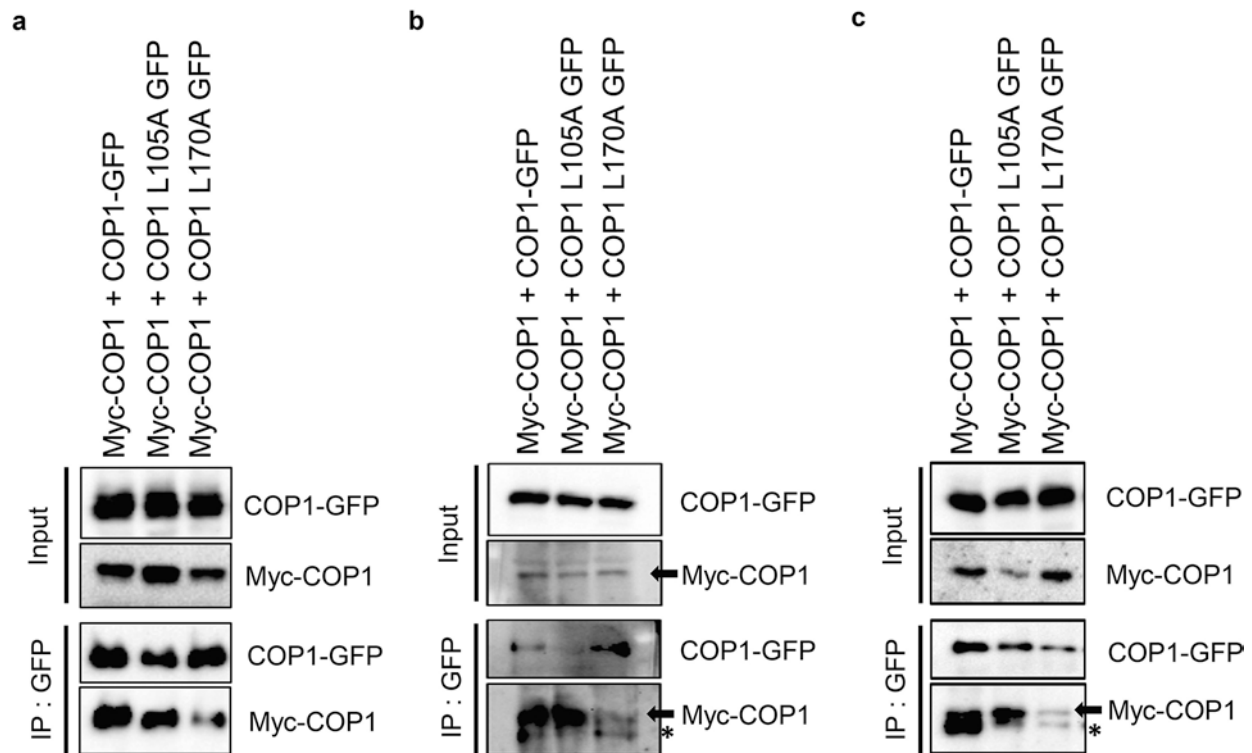

**Supplementary Figure 8. COP1<sup>L170A</sup> forms dimers poorly when compared with COP1<sup>WT</sup> or COP1<sup>L105A</sup> in *N. benthamiana*.** The three replicate results showed that COP1<sup>L170A</sup> was co-immunoprecipitated by COP1<sup>WT</sup> but much less COP1<sup>L170A</sup> was precipitated, compared with COP1<sup>WT</sup> or COP1<sup>L105A</sup>. (a) is shown in Fig. 6b, and (b, c) show two additional replicates of the results. The black arrows indicate Myc-COP1, and the asterisks indicate non-specific bands.



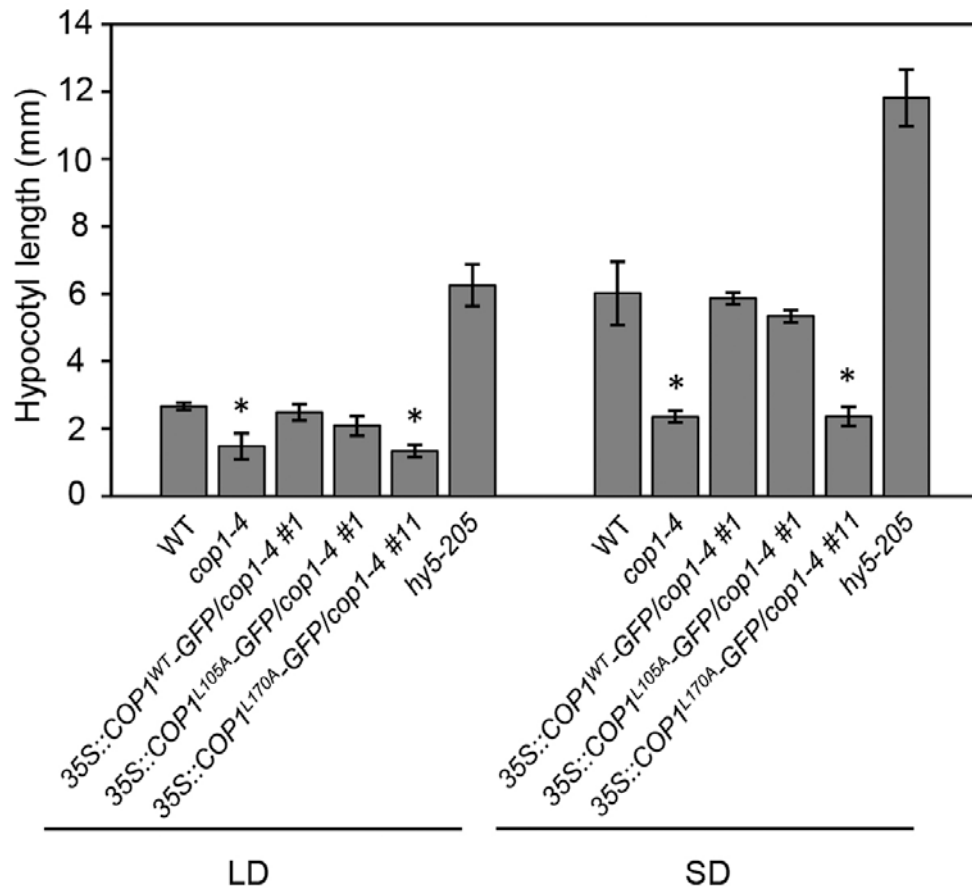

**Supplementary Figure 9. Hypocotyl lengths of the transgenic plants expressing mutant forms of COP1.** Plants were grown for 5 days in LD and SD under cool-white fluorescent light ( $90 \mu\text{mol m}^{-2} \text{s}^{-1}$ ). Data are means  $\pm$  standard deviations of 10 seedlings. Student's *t*-test (\*  $P < 0.001$ ).

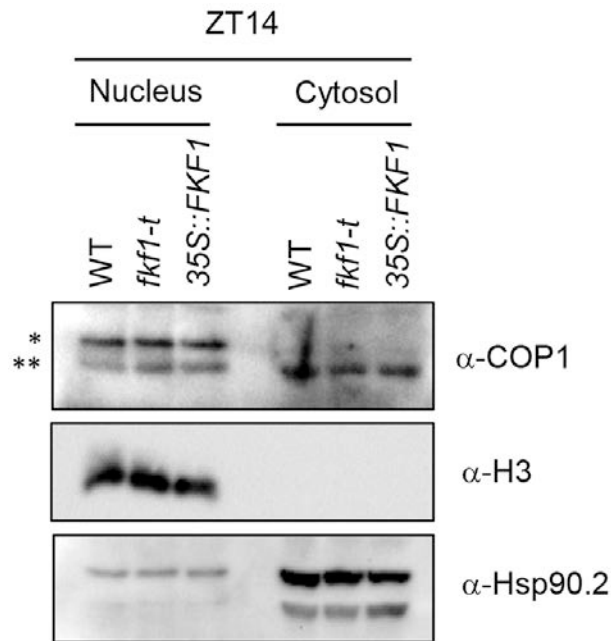

**Supplementary Figure 10. FKF1 is not involved in nuclear exclusion of COP1 in LD.** Ten-day-old plants grown in LD were harvested at ZT14 (2 h before dusk) in WT, *fkf1-t* and *35S::FKF1*. Nucleic and cytoplasmic protein enriched fractions were separated using the Plant Nuclei Isolation/Extraction Kit (Sigma) following the manufacturer's instructions, separated by 10% SDS-PAGE, and immunoblotted with an anti-COP1 antibody. Anti-H3 antibody and anti-Hsp90.2 antibody were used for controls (loading and fractionation). \* indicates a non-specific band, \*\* indicates the COP1 band.

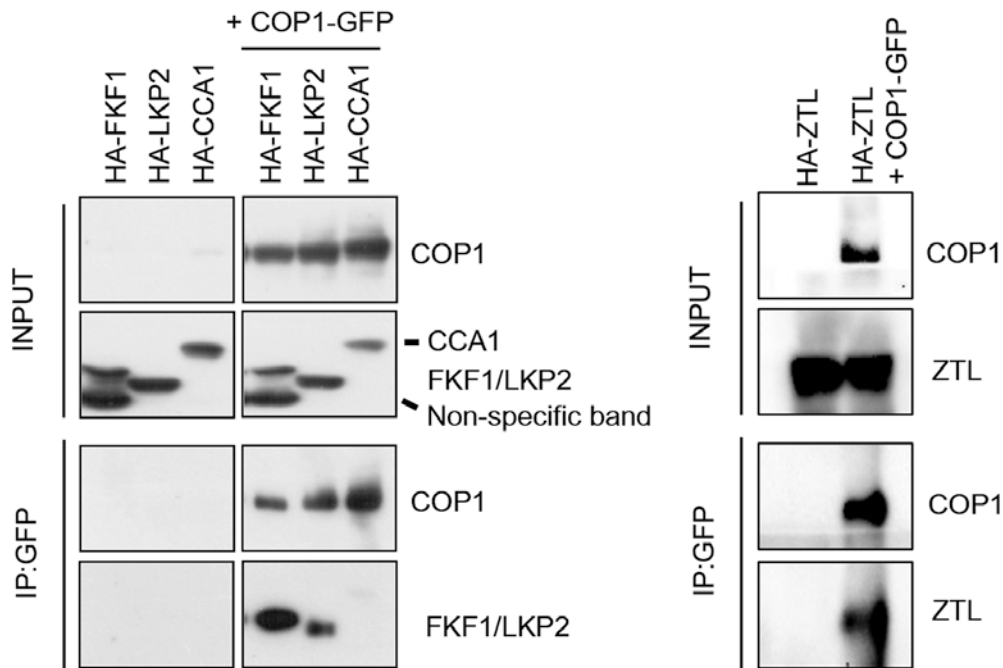

**Supplementary Figure 11. COP1 interacts with ZTL family members.** To investigate the interaction between COP1 and ZTL family members, we cloned COP1 into the pMDC85 binary vector (GFP tagging), and ZTL family members (ZTL/FKF1/LKP2) into the pEarleyGate 201 binary vector. These constructs were transformed into *Agrobacterium tumefaciens* strain GV3101, and co-infiltrated into the *N. benthamiana* leaves. The infiltrated tissues were harvested, immunoprecipitated by anti-COP1 antibody, and detected by anti-COP1 or anti-HA antibodies. HA-CCA1 was used for a negative control.

**Supplementary Figure 12:** pages 14-20.

**Note:** The following pages (Fig. S12) contain original images of immunoblots used in the indicated main and supplementary figures.

**Fig. 1c**

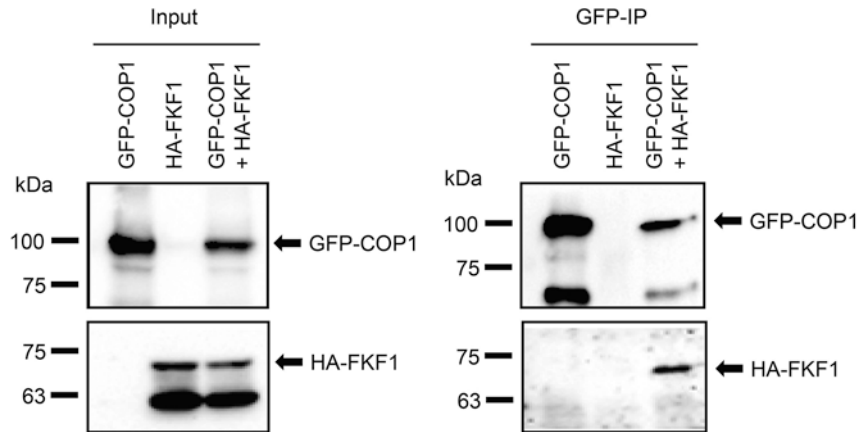

**Fig. 2a**

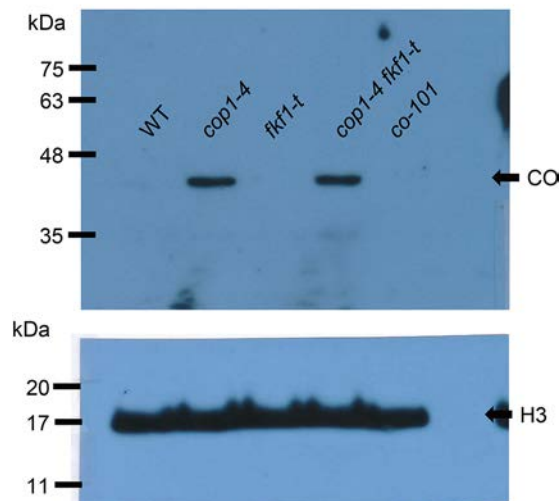

**Fig. 2b**

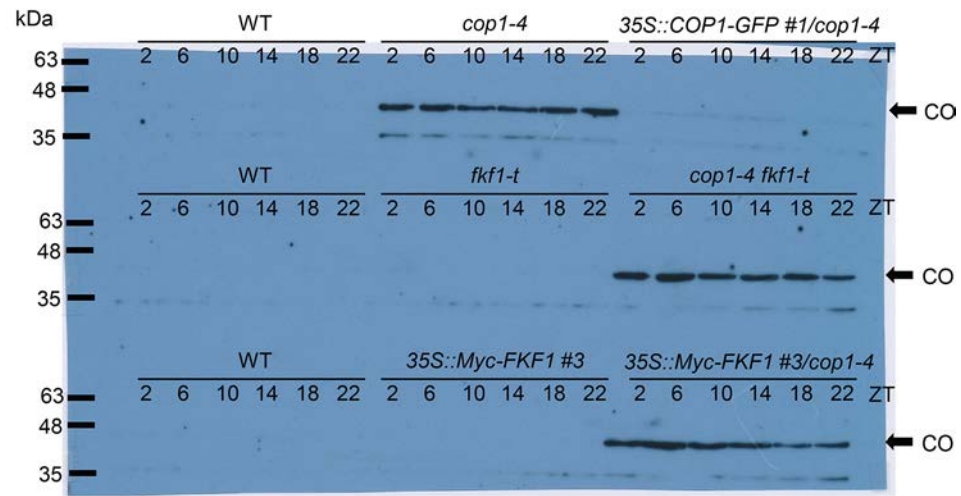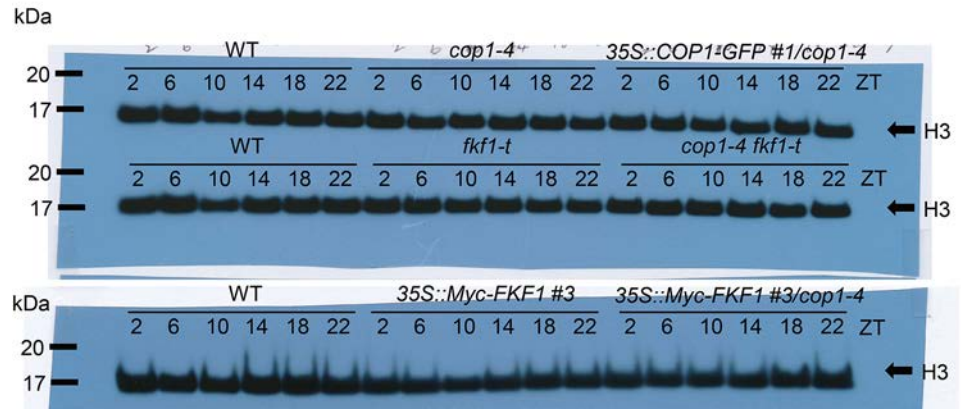

**Fig. 3**

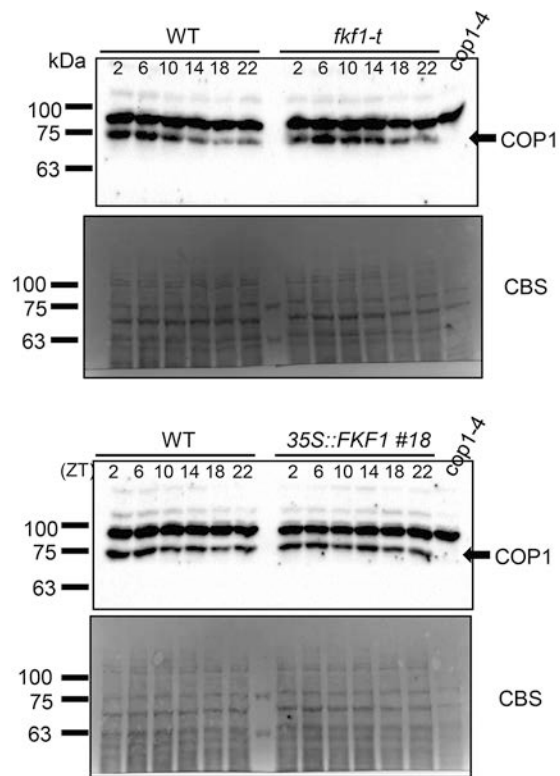

**Fig. 4a**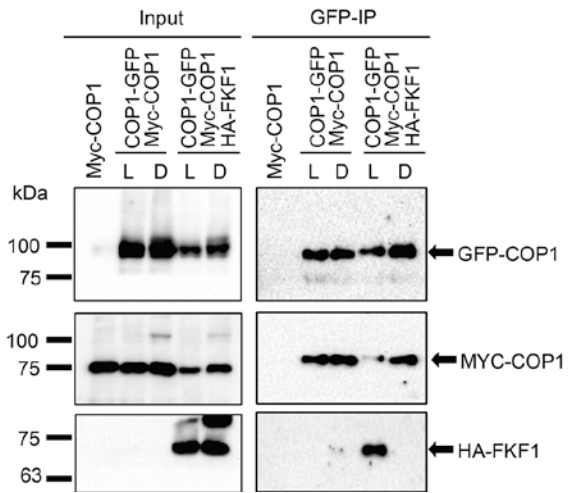**Fig. 4b**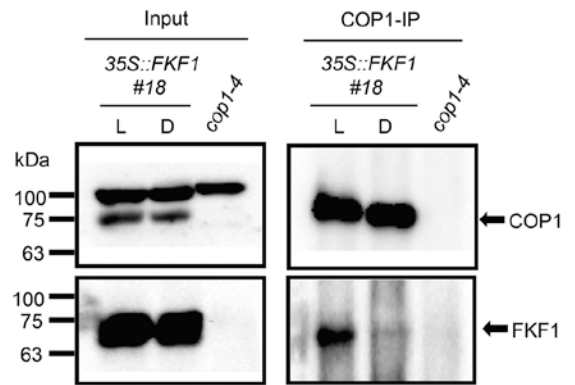**Fig. 5b**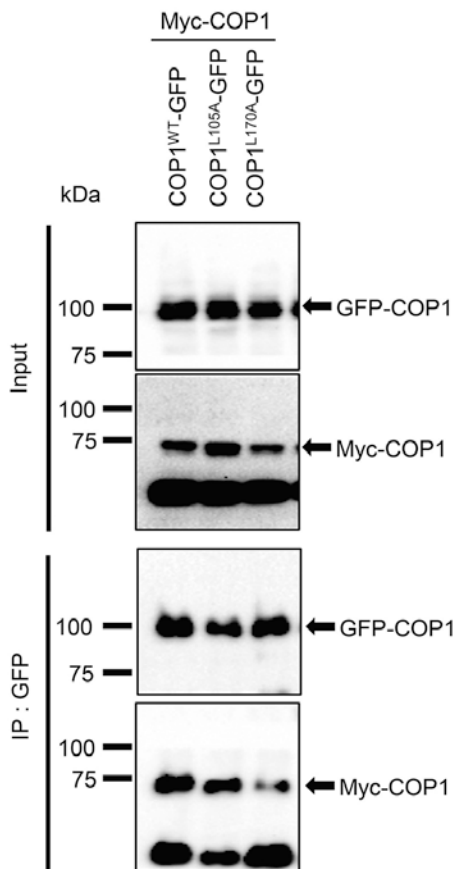**Fig. 5c**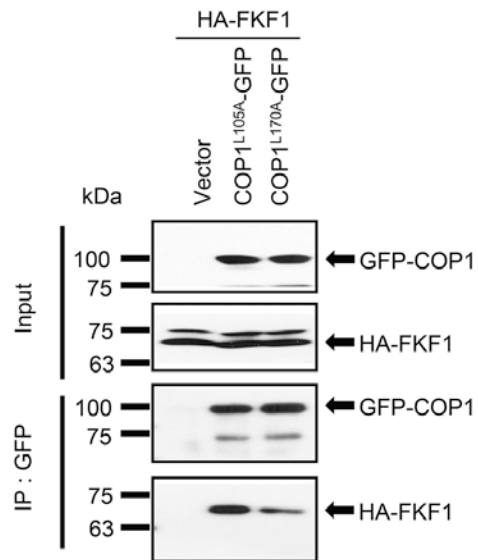

**Fig. 5f**

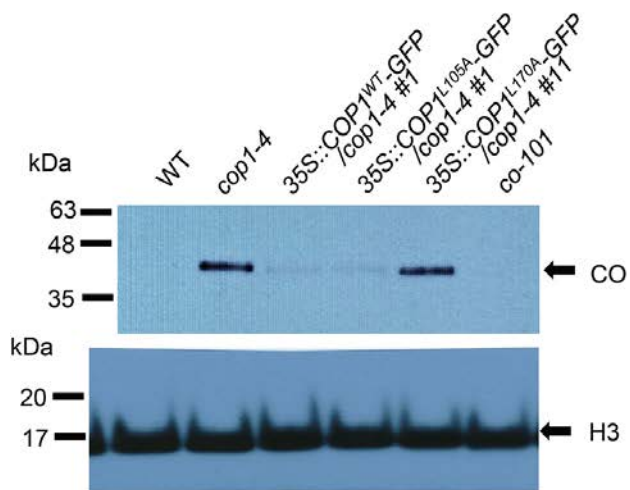

**Fig. 5i**

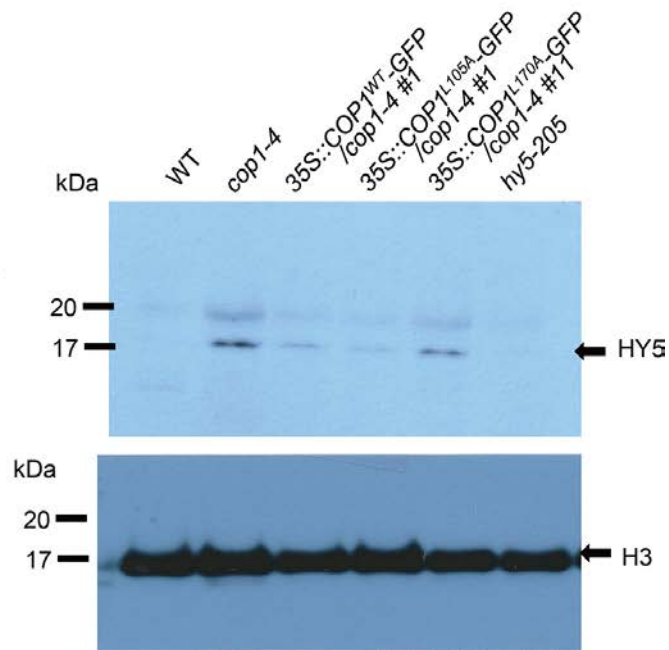



**Fig. S3a**

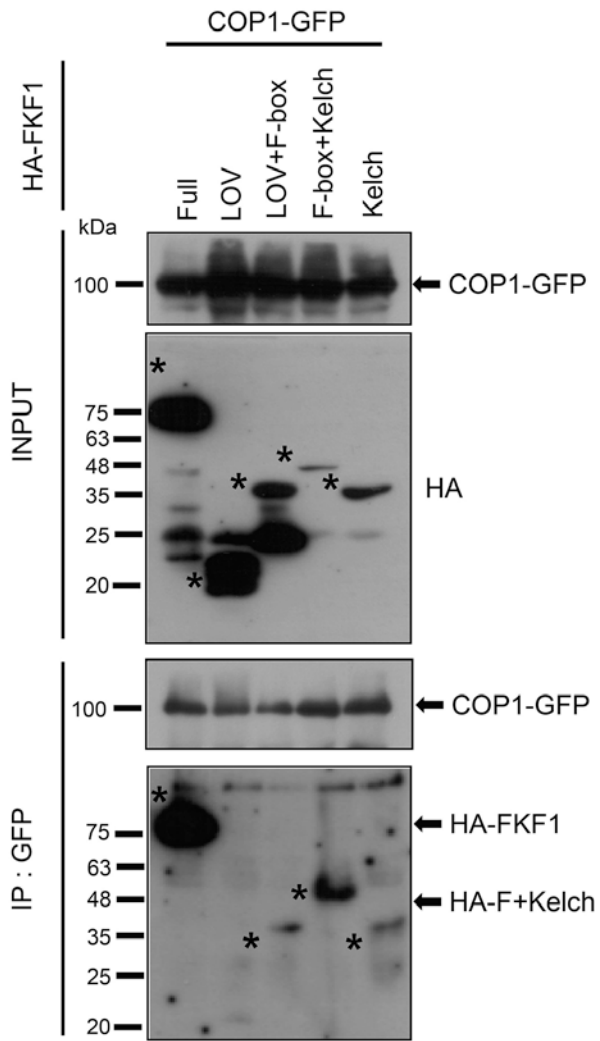

**Fig. S3b**

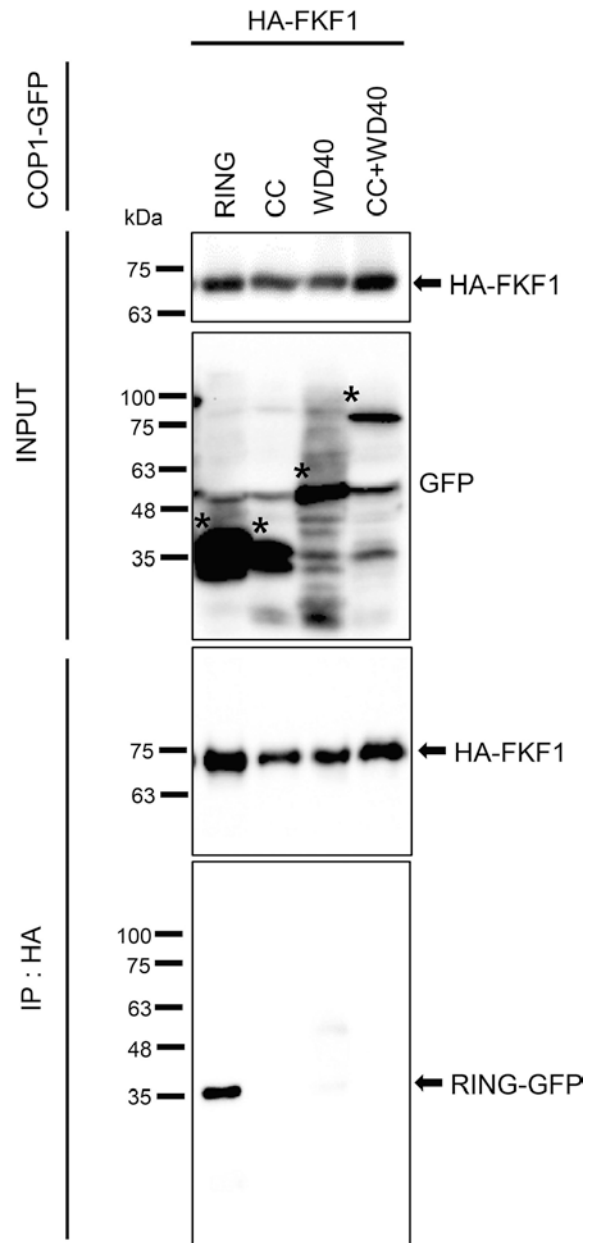

**Fig. S4**

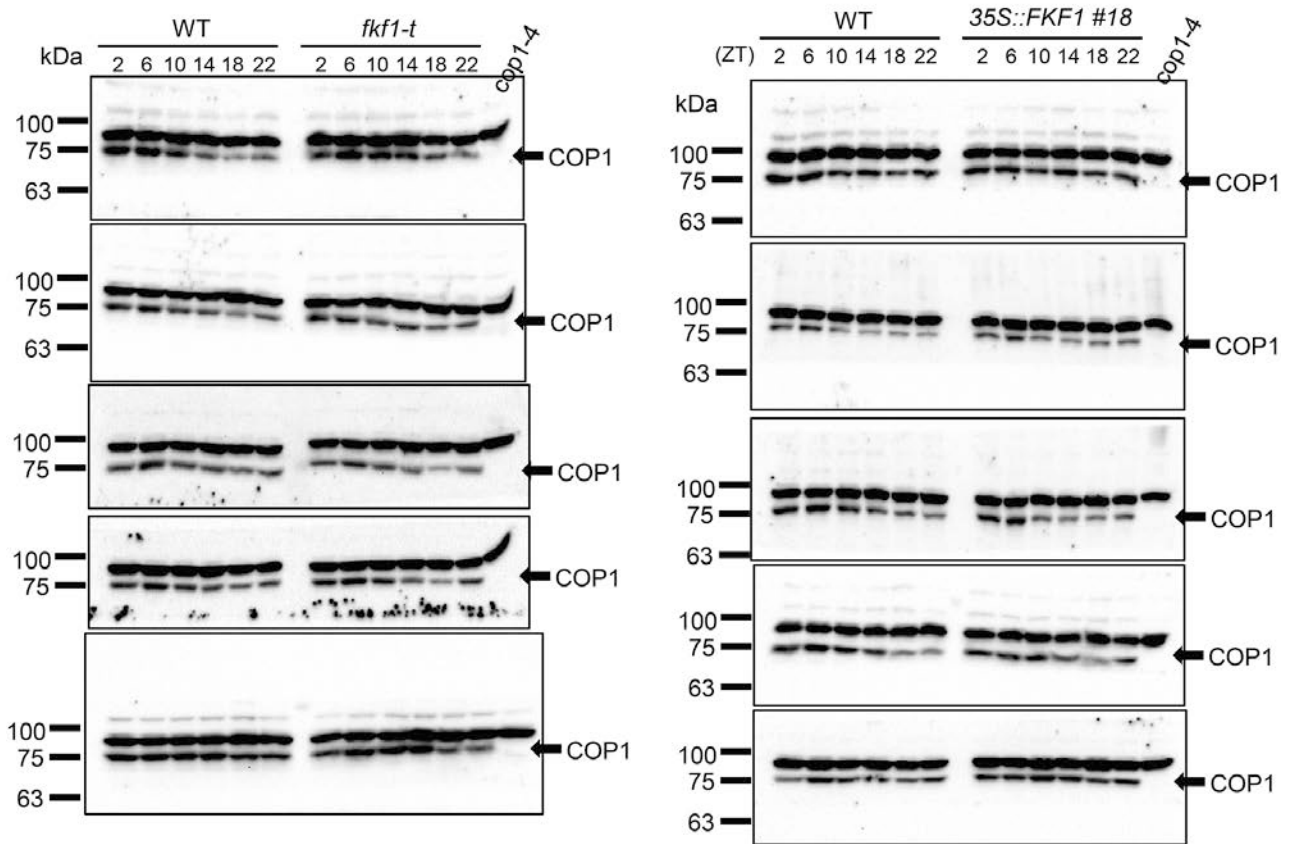

**Fig. S5**

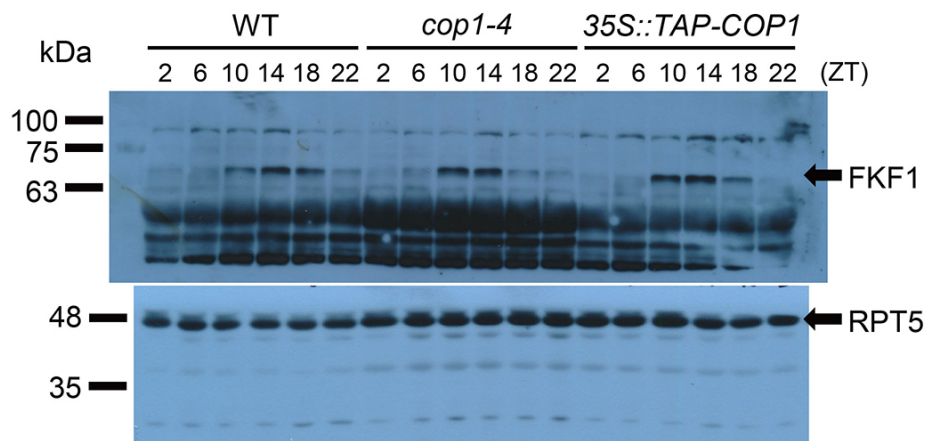

**Fig. S7b**

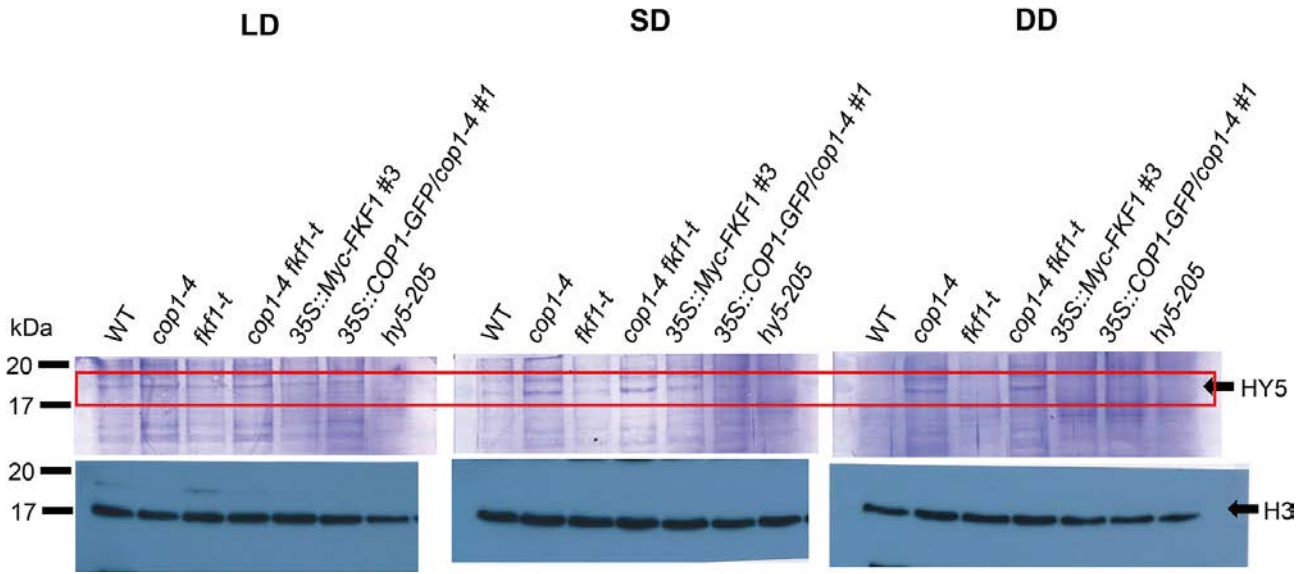

**Fig. S8a**

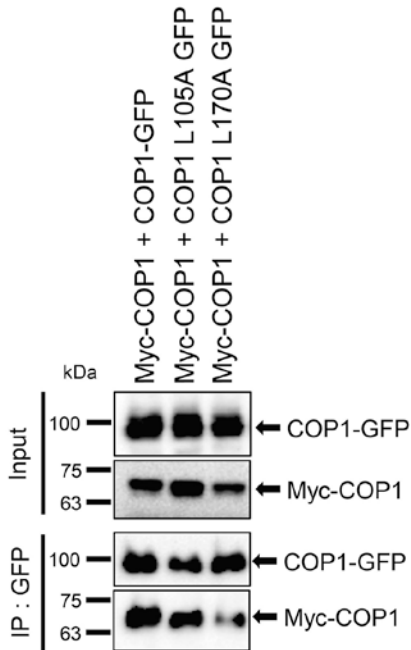

**Fig. S8b**

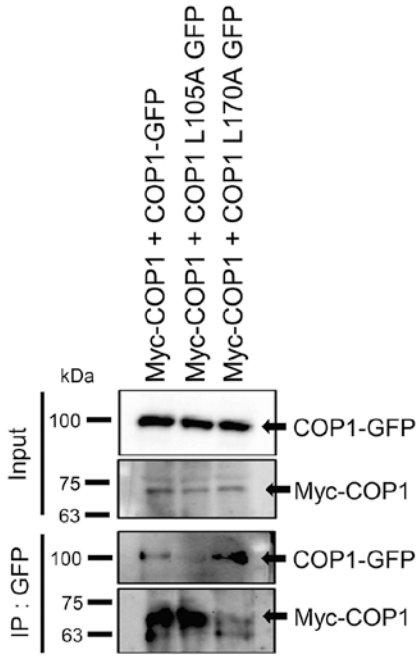

**Fig. S8c**

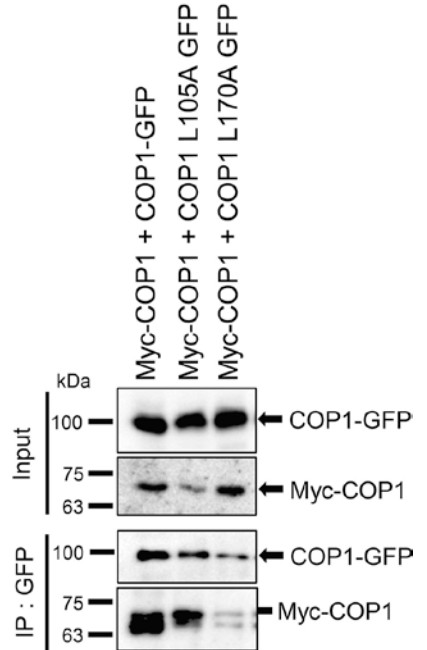

**Fig. S10**

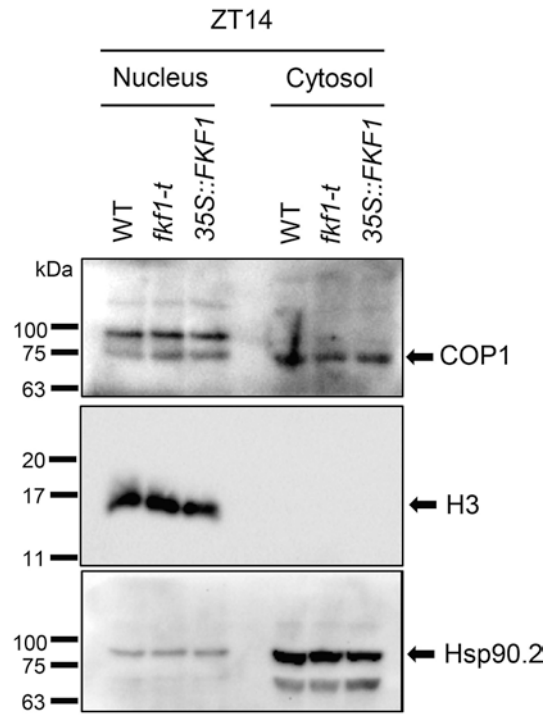

**Fig. S11**

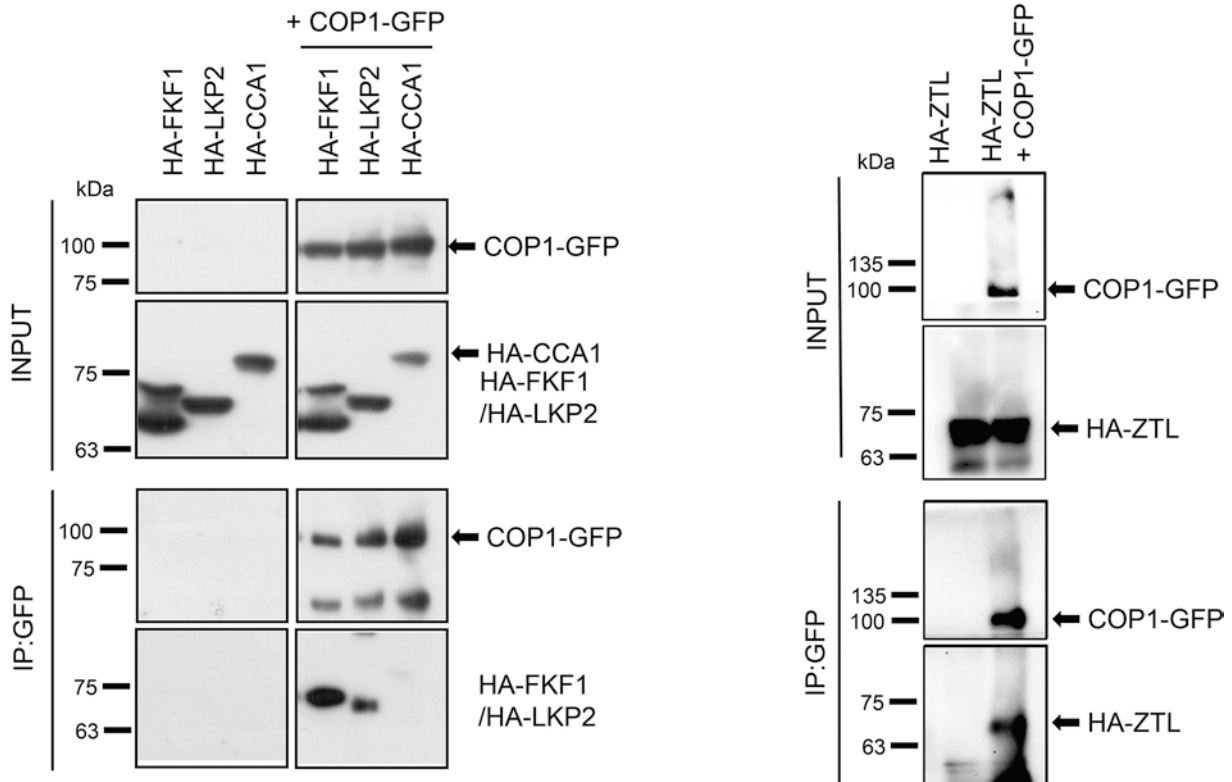

**Supplementary Figure 12. Uncropped images of immunoblots.** Blots shown as cropped images in various main and supplementary figures are shown as uncropped images here.

**Supplementary Table 1. Flowering time of different genotypes in LD and SD.**

| Genotype                         | No. of rosette leaves |            | No. of total leaves |            | days to bolting |            |
|----------------------------------|-----------------------|------------|---------------------|------------|-----------------|------------|
|                                  | LD                    | SD         | LD                  | SD         | LD              | SD         |
| WT                               | 12.0 ± 1.0            | 50.1 ± 2.3 | 14.5 ± 1.1          | 59.6 ± 2.4 | 30.5 ± 1.7      | 66.1 ± 2.3 |
| <i>cop1-4</i>                    | 11.3 ± 0.9            | 11.4 ± 0.7 | 13.1 ± 1.0          | 13.2 ± 1.1 | 30.0 ± 3.0      | 40.2 ± 3.5 |
| <i>fkf1-t</i>                    | 36.5 ± 4.3            | 44.2 ± 3.7 | 42.6 ± 5.0          | 52.9 ± 3.9 | 44.0 ± 2.0      | 67.1 ± 3.2 |
| <i>fkf1-2</i>                    | 37.5 ± 4.5            | 47.9 ± 5.1 | 44.4 ± 4.7          | 57.1 ± 6.3 | 45.8 ± 2.9      | 61.2 ± 3.4 |
| <i>cop1-4 fkf1-t</i>             | 10.9 ± 1.2            | 12.1 ± 1.0 | 12.8 ± 1.3          | 14.2 ± 1.4 | 31.7 ± 1.3      | 44.3 ± 1.0 |
| <i>35S::Myc-FKF1 #3</i>          | 9.2 ± 0.9             | 40.8 ± 3.1 | 11.7 ± 1.1          | 48.0 ± 3.6 | 27.3 ± 2.3      | 63.3 ± 3.2 |
| <i>35S::FKF1 #18</i>             | 9.3 ± 0.5             | 40.3 ± 7.1 | 11.5 ± 0.6          | 50.5 ± 7.1 | 26.3 ± 1.2      | 61.6 ± 5.4 |
| <i>35S::Myc-FKF1 #3 / cop1-4</i> | 9.3 ± 1.1             | 10.8 ± 0.9 | 10.9 ± 1.3          | 12.4 ± 1.2 | 27.6 ± 1.6      | 44.7 ± 1.5 |

Plants were grown at 22–24°C in LD and SD. Flowering time of each genotype was measured as the number of rosette leaves and total leaves, and days at bolting. Data are means ± standard deviations of at least 15 plants.

**Supplementary Table 2. Hypocotyl lengths of different genotypes under different light conditions.**

| Genotype                       | Hypocotyl length (mm) |              |              |
|--------------------------------|-----------------------|--------------|--------------|
|                                | LD                    | SD           | DD           |
| <i>hy5-205</i>                 | 6.22 ± 0.25           | 10.96 ± 1.09 | 15.06 ± 1.68 |
| WT                             | 2.40 ± 0.14           | 6.47 ± 0.30  | 14.79 ± 1.30 |
| <i>cop1-4</i>                  | 1.43 ± 0.17           | 2.49 ± 0.18  | 4.22 ± 0.17  |
| <i>fkf1-t</i>                  | 2.41 ± 0.20           | 6.48 ± 0.23  | 14.86 ± 1.64 |
| <i>fkf1-2</i>                  | 2.39 ± 0.20           | 6.57 ± 0.20  | 14.80 ± 1.33 |
| <i>cop1-4 fkf1-t</i>           | 1.38 ± 0.07           | 2.36 ± 0.15  | 4.10 ± 0.28  |
| <i>35S::Myc-FKF1 #3</i>        | 2.20 ± 0.22           | 5.11 ± 0.51  | 14.22 ± 1.48 |
| <i>35S::FKF1 #18</i>           | 2.23 ± 0.14           | 5.17 ± 0.41  | 14.29 ± 1.48 |
| <i>35S::COP1-GFP/cop1-4 #1</i> | 2.40 ± 0.14           | 6.24 ± 0.27  | 14.71 ± 1.27 |
| <i>35S::TAP-COP1/cop1-6</i>    | 2.43 ± 0.11           | 6.40 ± 0.27  | 14.63 ± 1.39 |

Plants were grown for 5 days in LD (16-h light: 8-h dark) and SD (8-h light: 16-h dark) under cool-white fluorescent light (90 μmol m<sup>-2</sup> s<sup>-1</sup>), or constant darkness (DD). Data are means ± standard deviations of at least 20 seedlings.

**Supplementary Table 3. Flowering times of the transgenic plants expressing mutant forms of COP1 in LD and SD.**

| Genotype                                        | No. of rosette leaves |            | No. of total leaves |            | days to bolting |            |
|-------------------------------------------------|-----------------------|------------|---------------------|------------|-----------------|------------|
|                                                 | LD                    | SD         | LD                  | SD         | LD              | SD         |
| WT                                              | 12.8 ± 0.4            | 54.5 ± 3.0 | 16.0 ± 1.2          | 63.0 ± 3.1 | 26.2 ± 1.3      | 58.2 ± 5.7 |
| <i>cop1-4</i>                                   | 11.7 ± 0.8            | 15.3 ± 0.8 | 13.3 ± 1.0          | 18.4 ± 1.3 | 27.3 ± 0.8      | 36.7 ± 0.8 |
| <i>35S::COP1<sup>WT</sup>-GFP/cop1-4 #1</i>     | 12.8 ± 0.8            | 65.3 ± 4.2 | 16.8 ± 1.5          | 73.7 ± 4.5 | 25.0 ± 1.7      | 66.0 ± 2.5 |
| <i>35S::COP1<sup>L105A</sup>-GFP/cop1-4 #1</i>  | 12.8 ± 0.8            | 65.0 ± 6.3 | 15.4 ± 1.1          | 73.2 ± 5.8 | 25.2 ± 1.1      | 61.8 ± 2.6 |
| <i>35S::COP1<sup>L170A</sup>-GFP/cop1-4 #11</i> | 12.9 ± 1.0            | 17.3 ± 1.4 | 15.4 ± 1.6          | 20.1 ± 1.6 | 25.5 ± 1.0      | 35.6 ± 0.7 |

Plants were grown at 22–24°C in LD and SD. Flowering time of each genotype was measured as the number of rosette leaves and total leaves, and days at bolting. Data are means ± standard deviations of at least 20 plants.

**Supplementary Table 4. Hypocotyl lengths of *COP1-GFP* transgenic lines in different light conditions.**

| Genotype                                        | Hypocotyl length (mm) |            |            |
|-------------------------------------------------|-----------------------|------------|------------|
|                                                 | LD                    | SD         | DD         |
| <i>hy5-205</i>                                  | 6.3 ± 0.6             | 11.8 ± 0.8 | 17.1 ± 0.6 |
| WT                                              | 2.7 ± 0.1             | 6.0 ± 0.9  | 17.1 ± 1.8 |
| <i>cop1-4</i>                                   | 1.5 ± 0.4             | 2.4 ± 0.2  | 5.3 ± 0.7  |
| <i>35S::COP1<sup>WT</sup>-GFP/cop1-4 #1</i>     | 2.5 ± 0.2             | 5.9 ± 0.2  | 16.8 ± 0.6 |
| <i>35S::COP1<sup>L105A</sup>-GFP/cop1-4 #1</i>  | 2.1 ± 0.3             | 5.3 ± 0.2  | 16.6 ± 1.3 |
| <i>35S::COP1<sup>L170A</sup>-GFP/cop1-4 #11</i> | 1.3 ± 0.2             | 2.4 ± 0.3  | 7.1 ± 1.1  |

Plants were grown for 5 days in LD (16-h light: 8-h dark) and SD (8-h light: 16-h dark) under cool-white fluorescent light (90 μmol m<sup>-2</sup> s<sup>-1</sup>), or constant darkness (DD). Data are means ± standard deviations of at least 10 seedlings.
